# Supplementary material for: Preparation of Curcumin Hydrogel Beads for the Development of Functional Kulfi: A Tailoring Delivery System
Source: MDPI journal article supplement (doi:10.3390/foods11020182), 2022-01-11
Supplement: s1 [file s1]

Supplementary Material

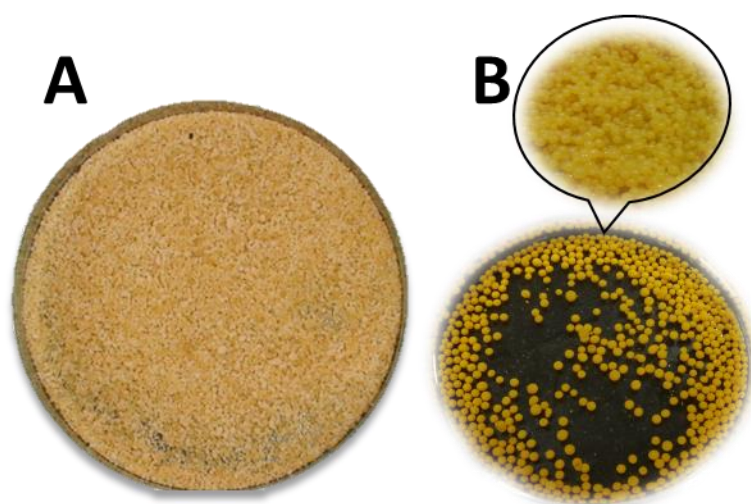

**Figure S1.** Visual observation of hydrogel beads. Control HBs (A) and CHBs (B). HBs, hydrogel beads; CHBs, curcumin hydrogel beads.
